# Supplementary material for: The influence of structural isomerism on fluorescence and organic dye selective adsorption in two complexes based on flexible ligands
Source: Royal Society of Chemistry journal article supplement (doi:10.1039/c6dt02090a), 2016-01-01
Supplement: c6dt02090a1.pdf [file c6dt02090a1.pdf]

# Supporting Information

## The Influence of Structural Isomerism on Fluorescence and Organic Dye Selective Adsorption in Two Complexes Based on Flexible Ligands

Wen-Huan Huang\*†, Jia-Zhi Li†, Lu-Sha Gao†, Yan-Xin Wang†, Shu-Ya Liu†, Min Jiang†, Tong Liu† and Yao-Yu Wang‡

† College of Chemistry & Chemical Engineering, Shaanxi University of Science & Technology, Xi'an, Shaanxi 710021, China.

‡ Key Laboratory of Synthetic and Natural Functional Molecule Chemistry of Ministry of Education, Department of Chemistry, Northwest University, Xi'an, Shaanxi, 710069, P.R. China.

### TABLE OF CONTENTS

|                                               |           |
|-----------------------------------------------|-----------|
| <b>(1) THE SUPPORTING FIGURES</b> .....       | <b>1</b>  |
| <b>(2) IR RESULTS</b> .....                   | <b>3</b>  |
| <b>(3) PXRD and TGA RESULTS</b> .....         | <b>4</b>  |
| <b>(4) LUMINESCENCE SENSING FIGURES</b> ..... | <b>5</b>  |
| <b>(5) ADSORPTION OF DYES</b> .....           | <b>8</b>  |
| <b>(6) CRYSTALLOGRAPHIC DATAS</b>             |           |
| <b>TABLES</b> .....                           | <b>11</b> |

## c(1) THE SUPPORTING FIGURES

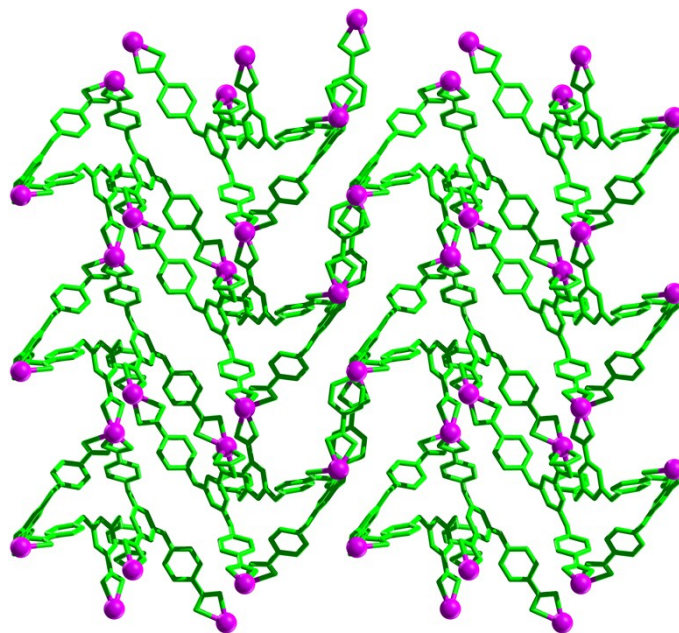

Figure S1. The 3D structure without the bpa linkers of **1** along the *a* axis.

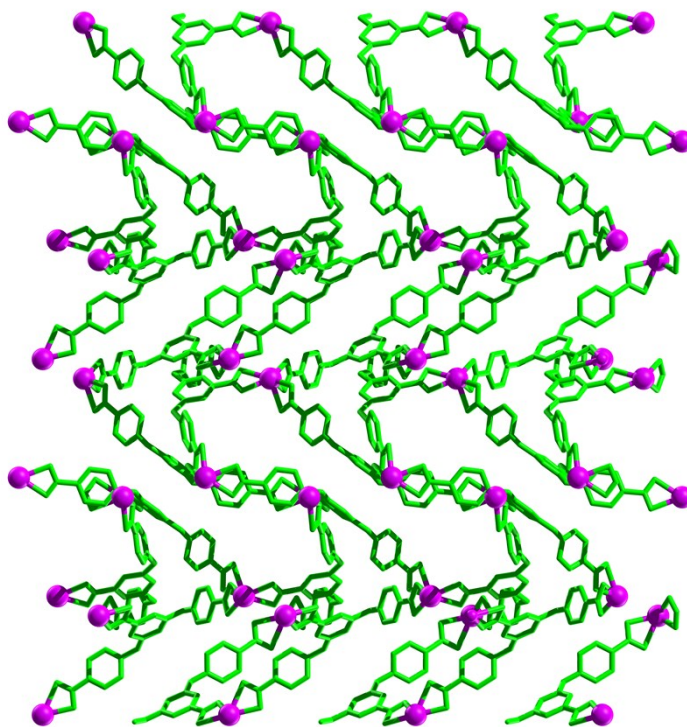

Figure S2. The 3D structure without the bpa linkers of **1** along the *b* axis.

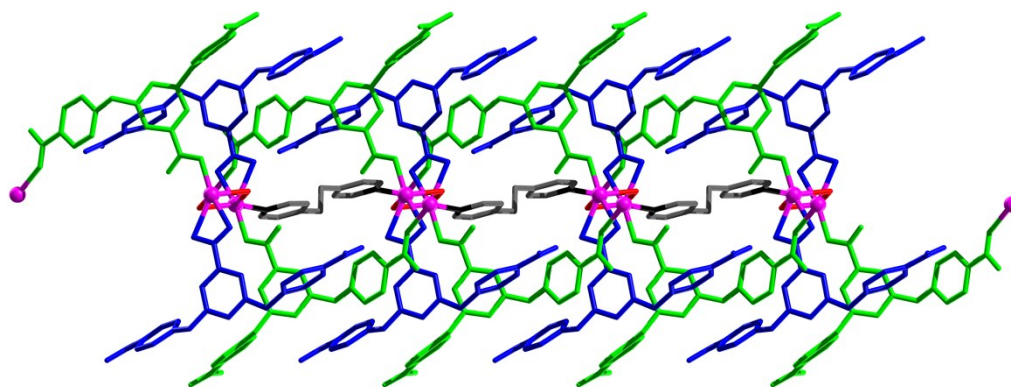

Figure S3. The 2D structure of **2** view along *a* axis.

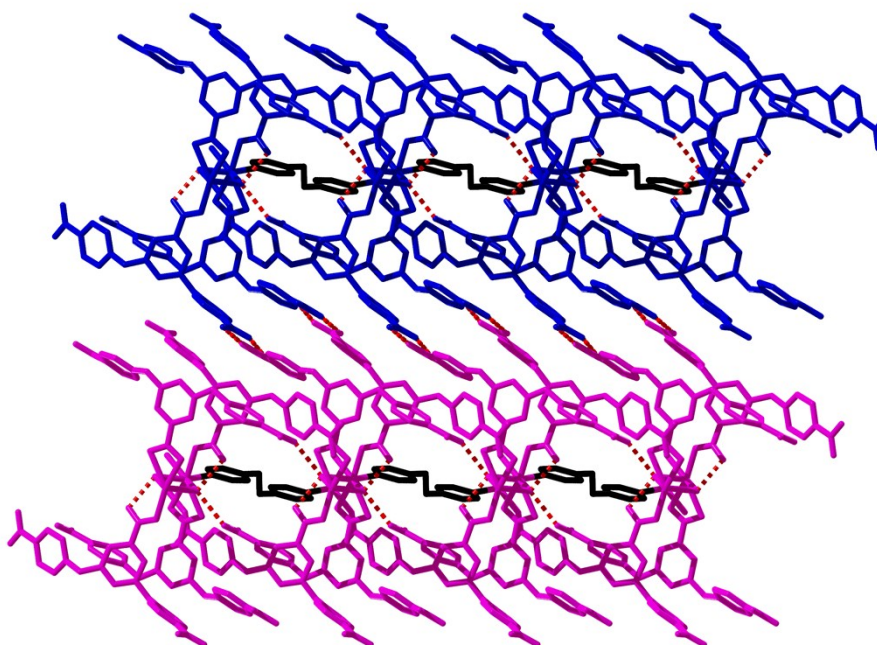

Figure S4. The 3D stacking of **2** along the *a* axis.

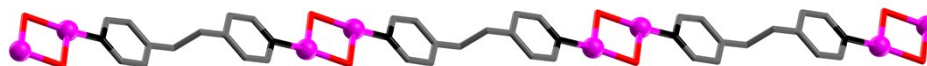

Figure S5. The assembly of bpa linkers in complex **2**.

## (2) IR RESULTS

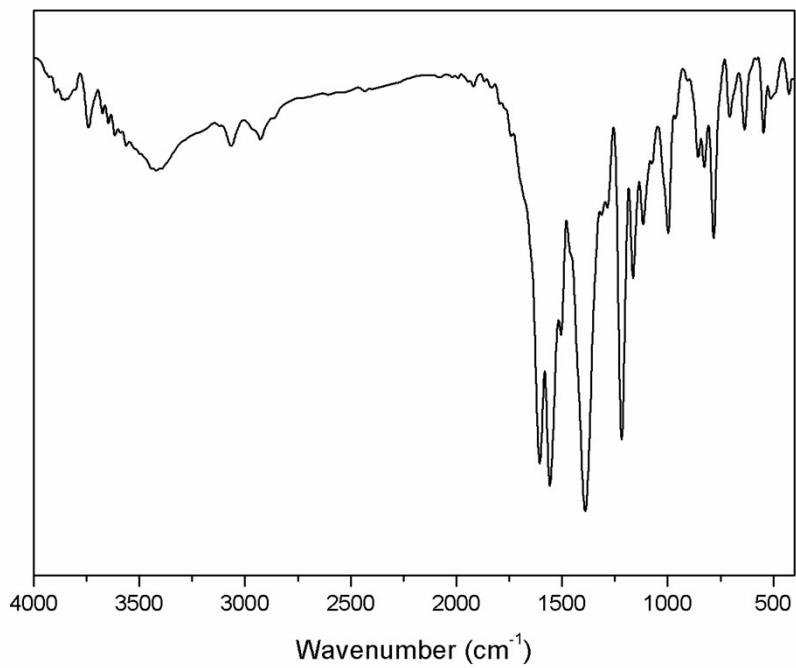

Figure S6. FT-IR spectroscopy of the complex 1.

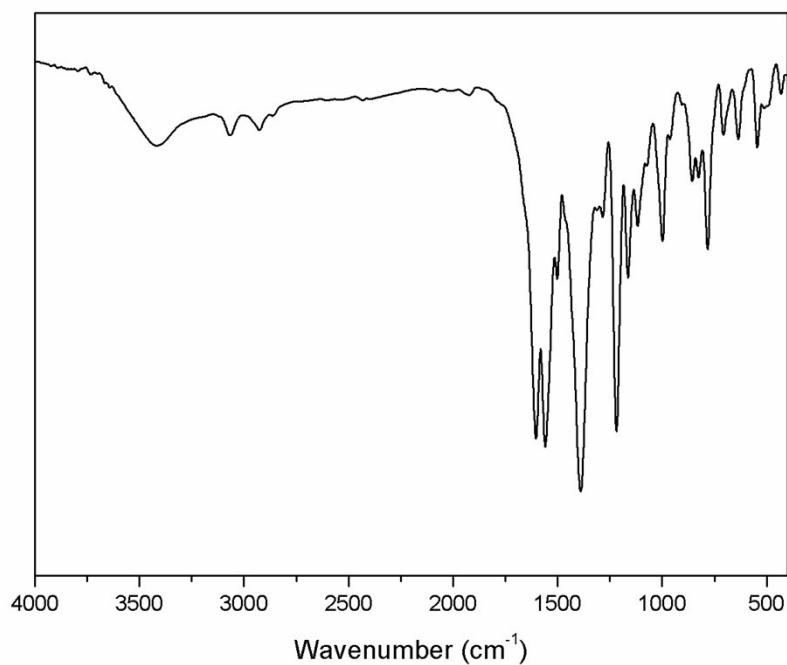

Figure S7. FT-IR spectroscopy of the complex 2.

### (3) PXRD and TGA RESULTS

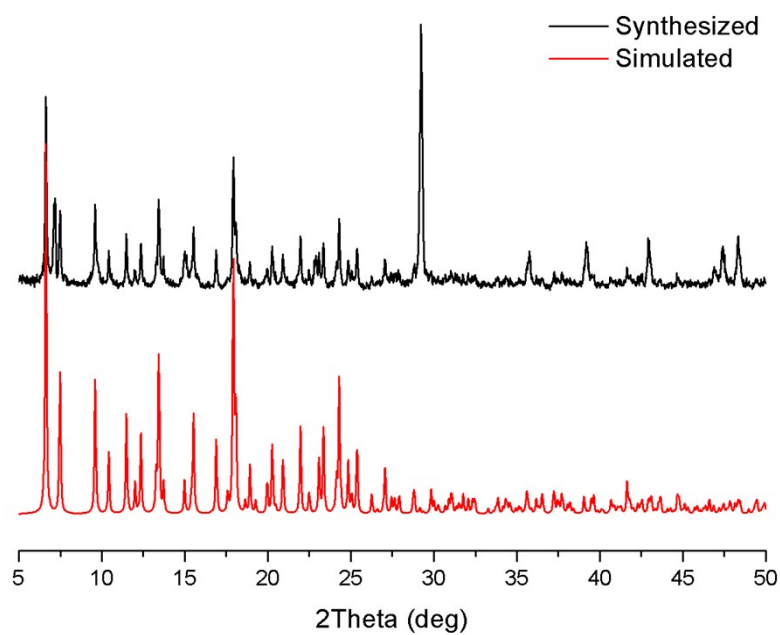

Figure S8. The PXRD result of 1.

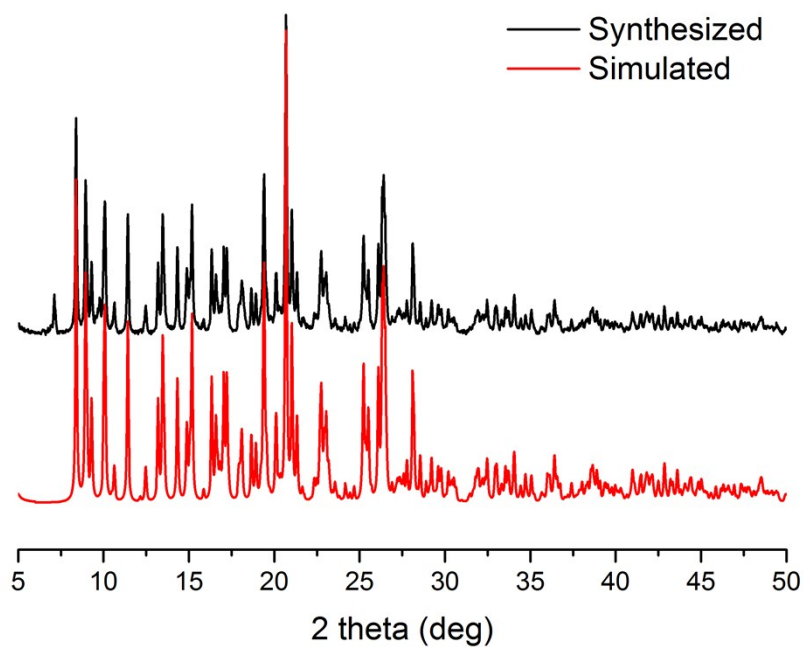

Figure S9. The PXRD result of 2.

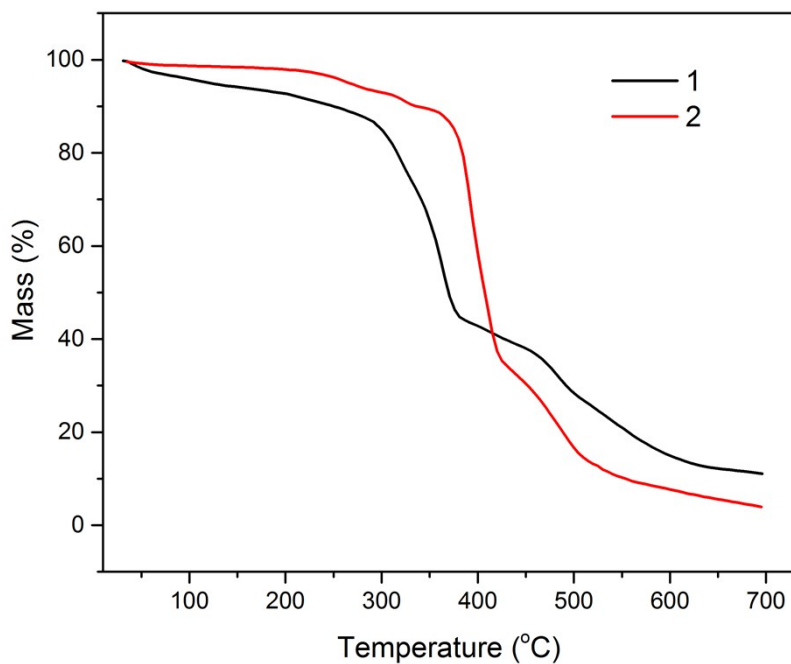

Figure S10. TGA curves of complex 1-2.

#### (4) LUMINESCENCE SENSING FIGURES

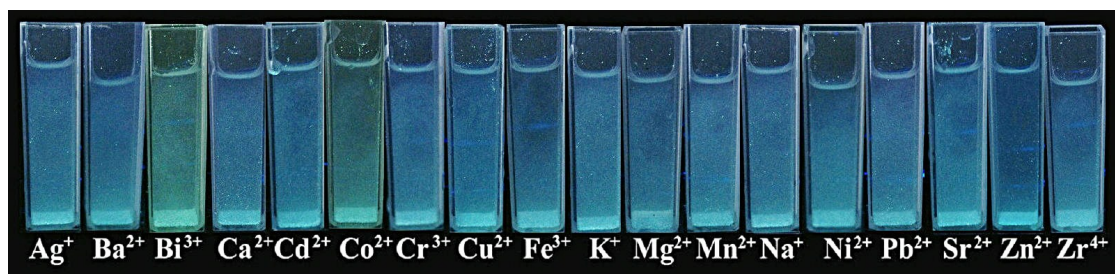

Figure S11. The visual fluorescence of complexes 1 after the addition of various metal cations.

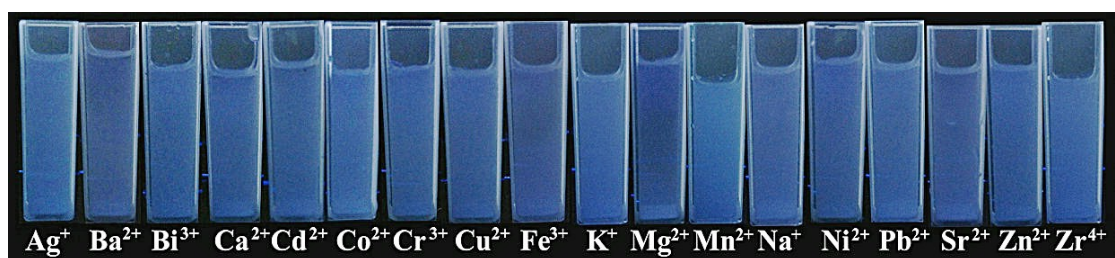

Figure S12. The visual fluorescence of complexes 2 after the addition of various metal cations.

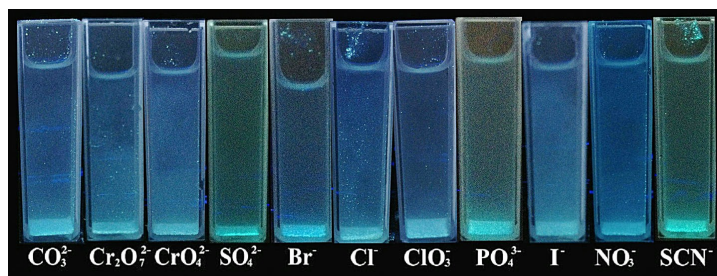

Figure S13. The visual fluorescence of complexes 1 after the addition of various anions.

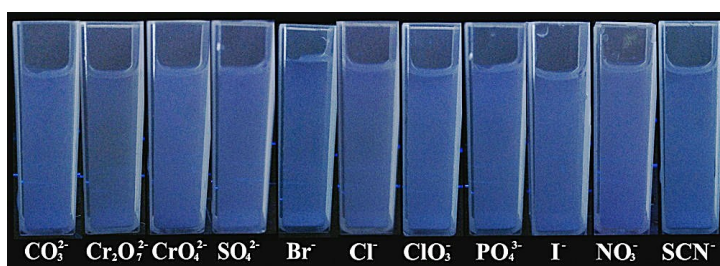

Figure S14. The visual fluorescence of complexes 2 after the addition of various anions.

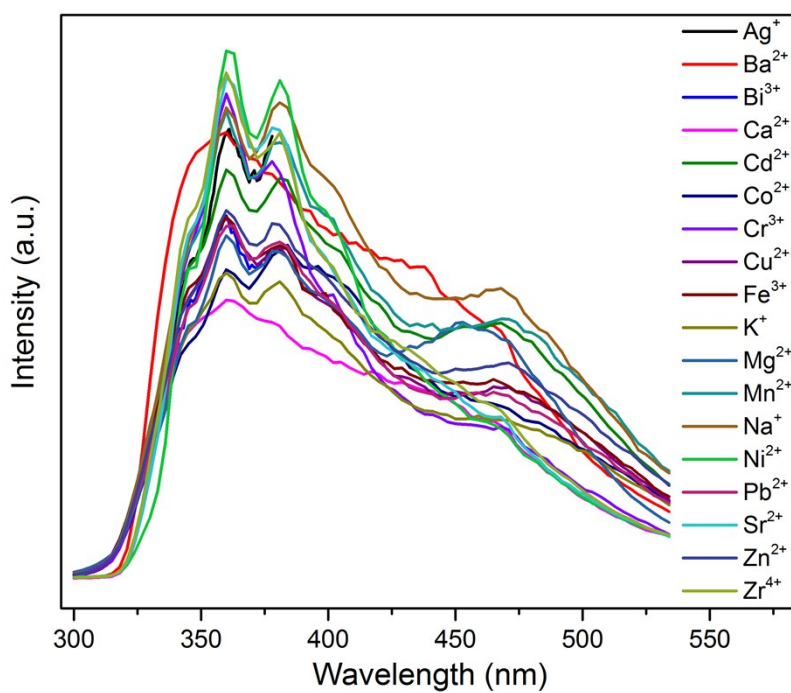

Figure S15. The fluorescence emission of complexes 1 suspension with various metal cations.

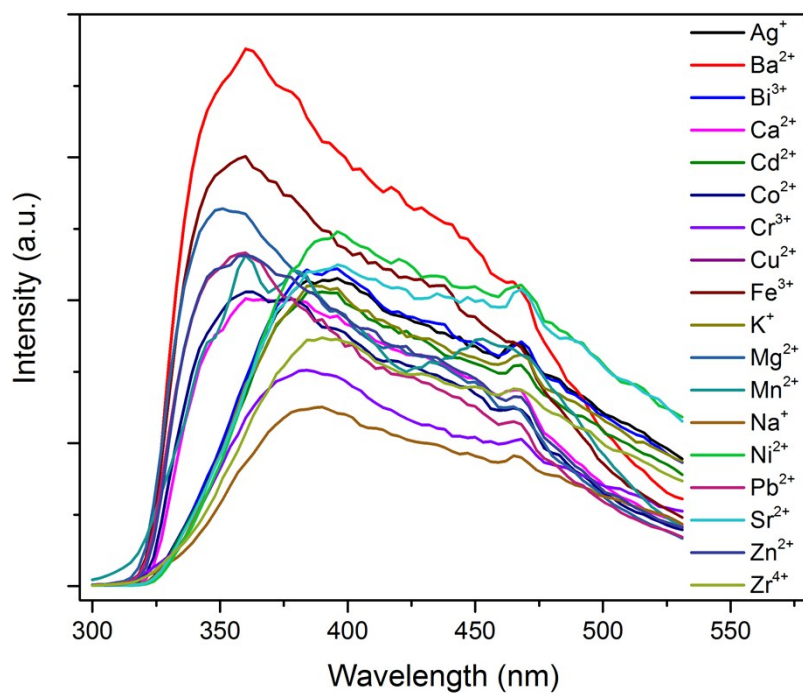

Figure S16. The fluorescence emission of complexes 2 suspension with various metal cations.

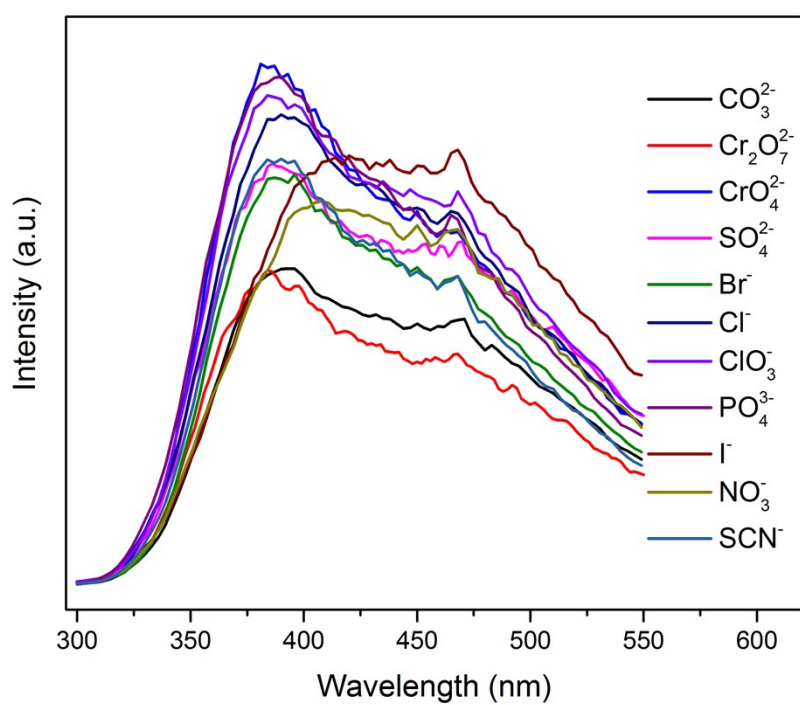

Figure S17. The fluorescence emission of complexes 1 suspension with various anions.



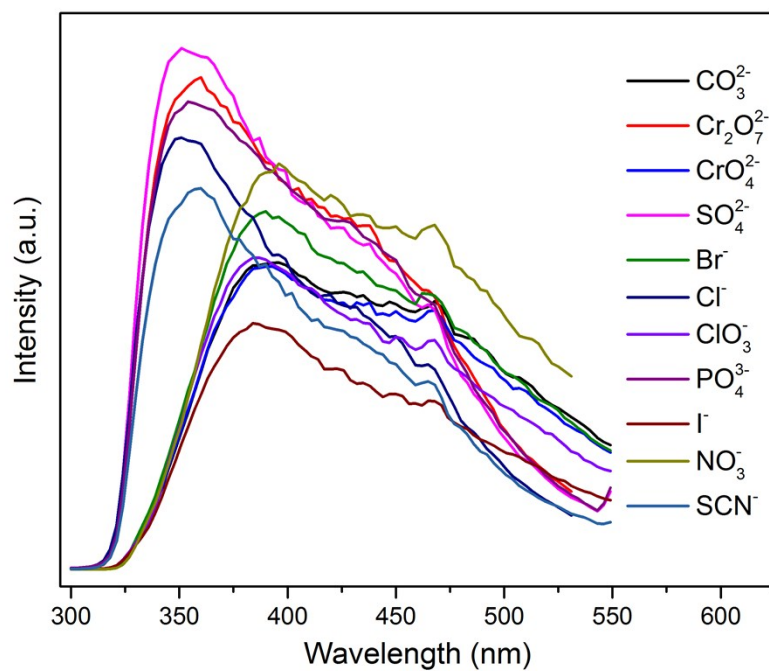

Figure S18. The fluorescence emission of complexes **2** suspension with various anions.

## (5) ADSORPTION OF DYES

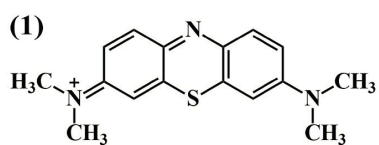

Methylene Blue (MB)

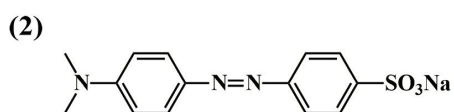

Methyl Orange (MO)

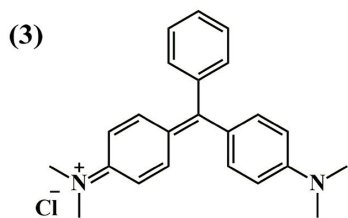

Malachite Green Oxalate (MGO)

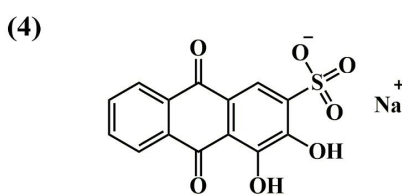

Alizarin Red (AR)

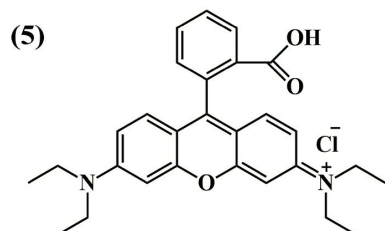

Rhodamine B (RB)

Figure S19. The structures of five kinds of dyes.

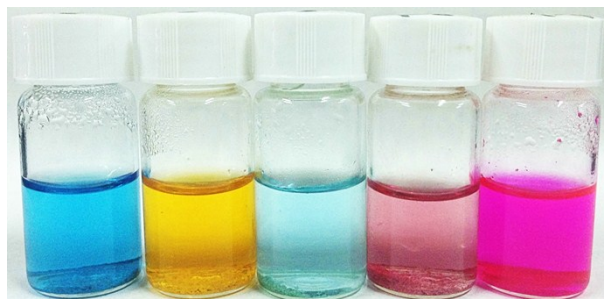

Figure S20. The naked-eye photos of dyes in 2 hours after the additions of complexes **1**.

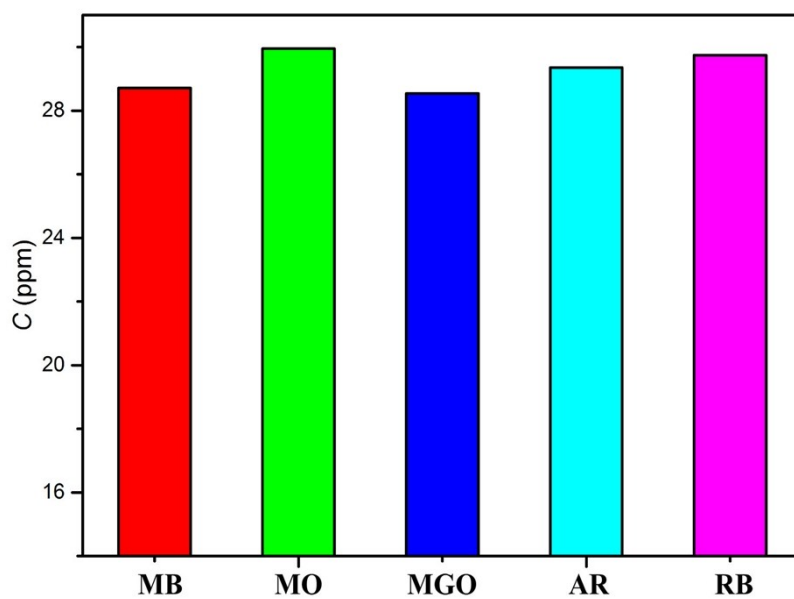

Figure S21. The concentrations of dyes in 2 hours after the additions of complexes **1**.

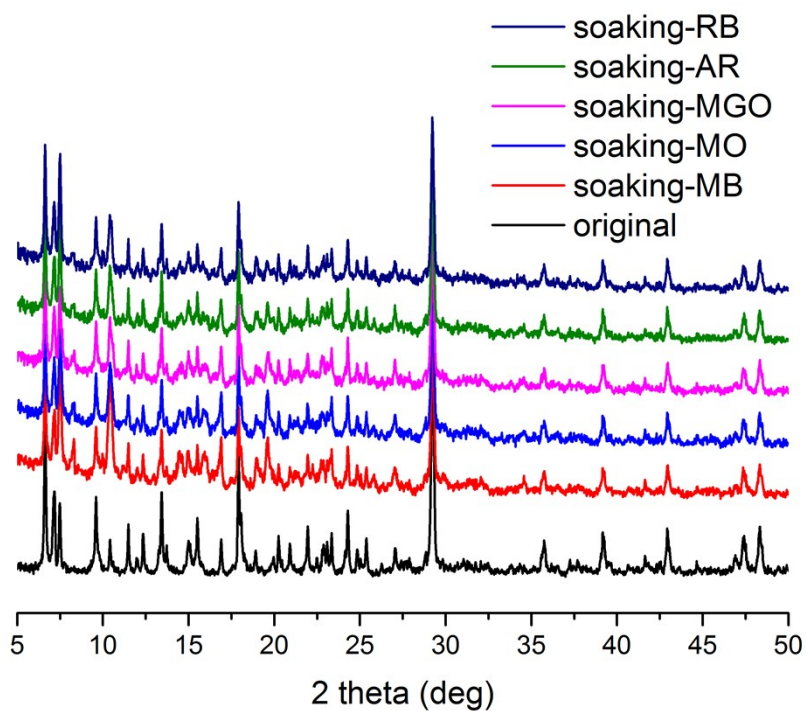

Figure S22. The PXRD results of complexes 1 after soaking in five dyes.

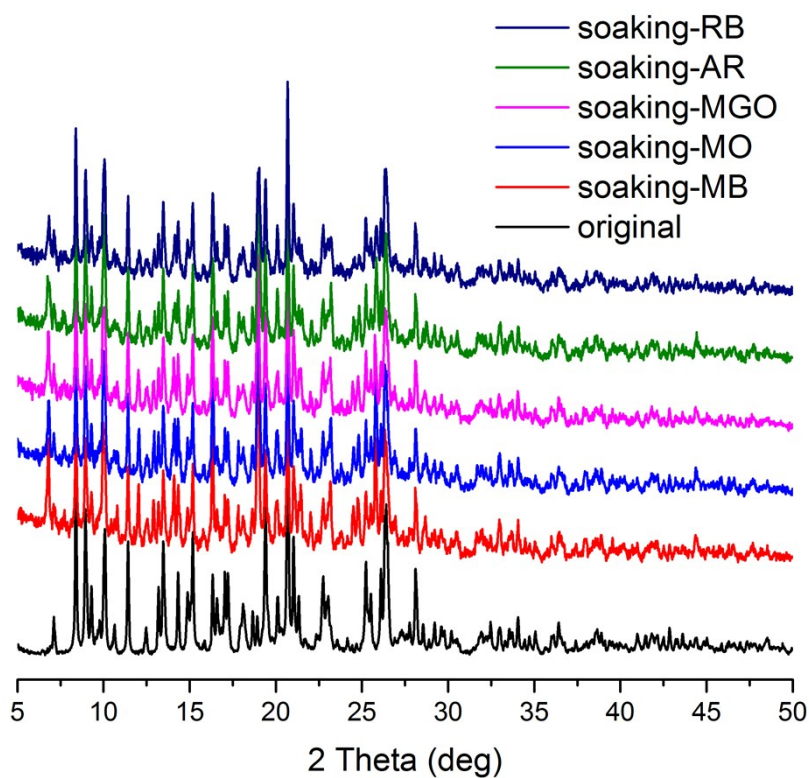

Figure S23. The PXRD results of complexes 2 after soaking in five dyes.

## (6) CRYSTALLOGRAPHIC DATAS TABLES

**Table S1.** Crystallographic data and details of diffraction experiments for complexes **1-2**.

| <b>Complex 1</b>     |                                                                                |                                                |              |
|----------------------|--------------------------------------------------------------------------------|------------------------------------------------|--------------|
| Formula              | C <sub>66</sub> H <sub>60</sub> Cd <sub>3</sub> N <sub>4</sub> O <sub>23</sub> | <i>V</i> (Å <sup>3</sup> )                     | 5227(5)      |
| <i>M<sub>r</sub></i> | 1614.36                                                                        | <i>Z</i>                                       | 3            |
| Crystal system       | Trigonal                                                                       | $\rho$ (g cm <sup>-3</sup> )                   | 1.537        |
| Space group          | <i>P</i> 3 <sub>2</sub> 21                                                     | $\mu$ (mm <sup>-1</sup> )                      | 0.985        |
| <i>a</i> (Å)         | 15.398(8)                                                                      | <i>T</i> (K)                                   | 293(2)       |
| <i>b</i> (Å)         | 15.398(8)                                                                      | Goof                                           | 1.027        |
| <i>c</i> (Å)         | 25.456(14)                                                                     | <i>R</i> [ <i>I</i> > 2 $\sigma$ ( <i>I</i> )] | R1 = 0.0703  |
| $\alpha$ (°)         | 90                                                                             |                                                | wR2 = 0.1780 |
| $\beta$ (°)          | 90                                                                             |                                                | R1 = 0.1043  |
| $\gamma$ (°)         | 120                                                                            | <i>R</i> (all data)                            | wR2 = 0.2044 |

  

| <b>Complex 2</b>     |                                                    |                                                |              |
|----------------------|----------------------------------------------------|------------------------------------------------|--------------|
| Formula              | C <sub>48</sub> H <sub>34</sub> CdNO <sub>17</sub> | <i>V</i> (Å <sup>3</sup> )                     | 2092.0(4)    |
| <i>M<sub>r</sub></i> | 1009.16                                            | <i>Z</i>                                       | 2            |
| Crystal system       | Triclinic                                          | $\rho$ (g cm <sup>-3</sup> )                   | 1.602        |
| Space group          | <i>P</i> -1                                        | $\mu$ (mm <sup>-1</sup> )                      | 0.605        |
| <i>a</i> (Å)         | 10.0495(13)                                        | <i>T</i> (K)                                   | 296(2)       |
| <i>b</i> (Å)         | 11.2187(14)                                        | Goof                                           | 1.068        |
| <i>c</i> (Å)         | 19.950(2)                                          | <i>R</i> [ <i>I</i> > 2 $\sigma$ ( <i>I</i> )] | R1 = 0.0415  |
| $\alpha$ (°)         | 79.844(2)                                          |                                                | wR2 = 0.1176 |
| $\beta$ (°)          | 82.668(2)                                          |                                                | R1 = 0.0500  |
| $\gamma$ (°)         | 71.385(2)                                          | <i>R</i> (all data)                            | wR2 = 0.1347 |

$$R_1 = \Sigma(|F_o| - |F_c|) / \Sigma|F_o|; wR_2 = [\Sigma w(F_o^2 - F_c^2)^2 / \Sigma w(F_o^2)^2]^{1/2}$$

**Table S2.** Selected Bond Lengths (Å) and Angles (deg) for **1-2**.

| <b>Complex 1</b>   |           |                     |           |
|--------------------|-----------|---------------------|-----------|
| Cd(1)-O(5)#2       | 2.239(5)  | Cd(1)-N(1B)         | 2.315(8)  |
| Cd(1)-O(7)#3       | 2.315 (8) | Cd(1)-N(1A)         | 2.341(7)  |
| Cd(1)-O(1)         | 2.345(6)  | Cd(1)-O(2)          | 2.385(6)  |
| Cd(1)-O(8)#3       | 2.544(7)  | Cd(1)-O(4)#2        | 2.582(7)  |
| Cd(2)-N(2)#4       | 2.223(8)  | Cd(2)-O(1W)         | 2.160(7)  |
| Cd(2)-O(3W)        | 2.350(14) | Cd(2)-O(2W)         | 2.264(17) |
| Cd(2)-N(2)         | 2.346(7)  | Cd(2)-O(1W)#4       | 2.348(7)  |
| Cd(2)-O(2W)#4      | 2.283(16) | Cd(2)-O(3W)#4       | 2.387(14) |
| O(5)#2-Cd(1)-N(1B) | 105.0(4)  | O(5)#2-Cd(1)-O(7)#3 | 114.3(2)  |
| N(1B)-Cd(1)-O(7)#3 | 88.2(4)   | O(5)#2-Cd(1)-N(1A)  | 100.9(3)  |
| O(5)#2-Cd(1)-O(1)  | 138.3(3)  | O(7)#3-Cd(1)-N(1A)  | 82.2(3)   |

|                       |          |                      |            |
|-----------------------|----------|----------------------|------------|
| O(7)#3-Cd(1)-O(1)     | 107.4(3) | N(1B)-Cd(1)-O(1)     | 77.4(3)    |
| O(5)#2-Cd(1)-O(2)     | 110.0(2) | N(1A)-Cd(1)-O(1)     | 86.1(3)    |
| O(7)#3-Cd(1)-O(2)     | 106.0(2) | N(1B)-Cd(1)-O(2)     | 131.6(3)   |
| O(1)-Cd(1)-O(2)       | 54.2(2)  | N(1A)-Cd(1)-O(2)     | 140.3(3)   |
| N(1B)-Cd(1)-O(8)#3    | 138.1(3) | O(5)#2-Cd(1)-O(8)#3  | 83.6(2)    |
| N(1A)-Cd(1)-O(8)#3    | 130.0(3) | O(7)#3-Cd(1)-O(8)#3  | 52.2(2)    |
| O(2)-Cd(1)-O(8)#3     | 79.0(2)  | O(1)-Cd(1)-O(8)#3    | 122.9(2)   |
| N(1B)-Cd(1)-O(4)#2    | 85.4(4)  | O(5)#2-Cd(1)-O(4)#2  | 52.8(2)    |
| N(1A)-Cd(1)-O(4)#2    | 89.2(3)  | O(7)#3-Cd(1)-O(4)#2  | 163.0(2)   |
| O(2)-Cd(1)-O(4)#2     | 90.0(2)  | O(1)-Cd(1)-O(4)#2    | 86.6(2)    |
| O(1W)#4-Cd(2)-O(1W)   | 167.9(5) | O(8)#3-Cd(1)-O(4)#2  | 128.1 (2)  |
| O(1W)-Cd(2)-N(2)      | 88.8(3)  | O(1W)#4-Cd(2)-N(2)   | 88.0(3)    |
| O(1W)-Cd(2)-N(2)#4    | 96.1(3)  | O(1W)#4-Cd(2)-N(2)#4 | 87.3(3)    |
| O(1W)#4-Cd(2)-O(2W)   | 86.4(8)  | N(2)-Cd(2)-N(2)#4    | 175.06(16) |
| N(2)-Cd(2)-O(2W)      | 91.0(9)  | O(1W)-Cd(2)-O(2W)    | 82.0(8)    |
| O(1W)#4-Cd(2)-O(3W)#4 | 81.0(4)  | N(2)#4-Cd(2)-O(2W)   | 90.1(9)    |
| N(2)-Cd(2)-O(3W)#4    | 89.3(6)  | O(1W)-Cd(2)-O(3W)#4  | 110.6(4)   |
| O(2W)-Cd(2)-O(3W)#4   | 167.4(8) | N(2)#4-Cd(2)-O(3W)#4 | 88.5(6)    |
| O(1W)-Cd(2)-O(3W)     | 85.8(5)  | O(1W)#4-Cd(2)-O(3W)  | 105.6(4)   |
| N(2)#4-Cd(2)-O(3W)    | 93.3(6)  | N(2)-Cd(2)-O(3W)     | 86.6(6)    |
| O(3W)#4-Cd(2)-O(3W)   | 24.9(7)  | O(2W)-Cd(2)-O(3W)    | 167.7(8)   |
| O(1W)-Cd(2)-O(2W)#4   | 90.5(8)  | N(2)#4-Cd(2)-O(2W)#4 | 93.8(9)    |
| O(2W)#4-Cd(2)-N(2)    | 86.6(9)  | O(1W)-Cd(2)-O(1W)#4  | 167.9(5)   |

Symmetry transformations used to generate equivalent atoms: #1 x-y+1,-y+1,-z+1/3; #2 x-y,-y+1,-z+1/3; #3 -x+y+1,-x+1,z+1/3; #4 x-y+1,-y+2,-z-2/3; #5 -y+1,x-y,z-1/3.

**Table S3.** Selected Bond Lengths (Å) and Angles (deg) for **2**.

| Complex <b>2</b>    |            |                      |            |
|---------------------|------------|----------------------|------------|
| Cd(1)-O(10)         | 2.265(3)   | Cd(1)-O(4)#1         | 2.361(3)   |
| Cd(1)-O(1)          | 2.346(3)   | Cd(1)-O(1W)#2        | 2.411(3)   |
| Cd(1)-O(1W)         | 2.383(3)   | Cd(1)-N(1)           | 2.313(4)   |
| Cd(1)-O(9)          | 2.560(3)   |                      |            |
| O(10)-Cd(1)-N(1)    | 98.77(12)  | O(10)-Cd(1)-O(1)     | 167.91(10) |
| N(1)-Cd(1)-O(1)     | 91.59(12)  | O(10)-Cd(1)-O(4)#1   | 94.66(10)  |
| N(1)-Cd(1)-O(4)#1   | 85.07(11)  | O(1)-Cd(1)-O(4)#1    | 79.96(10)  |
| O(10)-Cd(1)-O(1W)   | 84.64(11)  | N(1)-Cd(1)-O(1W)     | 163.69(12) |
| O(1)-Cd(1)-O(1W)    | 83.70(11)  | O(4)#1-Cd(1)-O(1W)   | 78.74(11)  |
| O(10)-Cd(1)-O(1W)#2 | 103.65(11) | N(1)-Cd(1)-O(1W)#2   | 117.81(11) |
| O(1)-Cd(1)-O(1W)#2  | 76.61(11)  | O(4)#1-Cd(1)-O(1W)#2 | 147.32(11) |
| O(1W)-Cd(1)-O(1W)#2 | 76.34(12)  | O(10)-Cd(1)-O(9)     | 53.57(10)  |
| N(1)-Cd(1)-O(9)     | 78.92(11)  | O(1)-Cd(1)-O(9)      | 135.54(9)  |
| O(4)#1-Cd(1)-O(9)   | 140.75(10) | O(1W)-Cd(1)-O(9)     | 115.18(11) |
| O(1W)#2-Cd(1)-O(9)  | 70.30(10)  |                      |            |

Symmetry transformations used to generate equivalent atoms: #1  $x+1,y-1,z$  ; #2  $-x,-y+1,-z+1$ ; #3  $x-1,y+1,z$ ; #4  $-x+1,-y+2,-z+1$ .

## REFERENCES

- [1] Sheldrick G M. *SHELXL-97, Program for Crystal Structure Determination*, University of Göttingen, Germany, 1997.
- [2] Sheldrick G M. *SHELXL-97, Program for Crystal Structure Refinement*, University of Göttingen, Germany, 1997.
